# Supplementary material
Source: publisher figshare collection journal article supplement (https://acs.figshare.com/ndownloader/files/5185378)
Supplement: Supplementary file 1 [file 5185378]

## Supporting Information

### Photoinduced Electron-transfer Bicyclopropenyl–benzene Rearrangements of 2,2',3,3'-Tetraphenylbicyclopropenyls: A New Mechanism via Dewar Benzene

Hiroshi Ikeda,\* Yosuke Hoshi, Yuka Kikuchi, Futoshi Tanaka, and Tsutomu Miyashi

*Department of Chemistry, Graduate School of Science, Tohoku University, Sendai 980-8578, Japan*

**(1) Analyses of time-dependent change in the product ratios:** A  $\text{CD}_2\text{Cl}_2$  (0.6 mL) solution containing **3** (0.06 mmol, 0.1 M) and DCA (0.01 mmol,  $0.02 \text{ M}^{31}$ ) in a Pyrex NMR tube was degassed by five repeated freeze ( $-196^\circ\text{C}$ )–pump ( $10^{-2}$  Torr)–thaw ( $0^\circ\text{C}$ ) cycles and then sealed at  $10^{-2}$  Torr. The solution was irradiated through a cutoff filter ( $\lambda > 410 \text{ nm}$  for DCA) with a 2 kW Xe lamp at  $20 \pm 1^\circ\text{C}$ . The product ratios during photoreaction were determined by 200 MHz  $^1\text{H}$  NMR analyses (errors are ca.  $\pm 2\%$ ). The material balance was determined also by  $^1\text{H}$  NMR analyses using 1,1,2,2- or 1,1,1,2-tetrachloroethane as an internal standard for integration.

**(2) Time-dependent changes in the product ratios in the DCA-sensitized PET reaction of **3a**.**

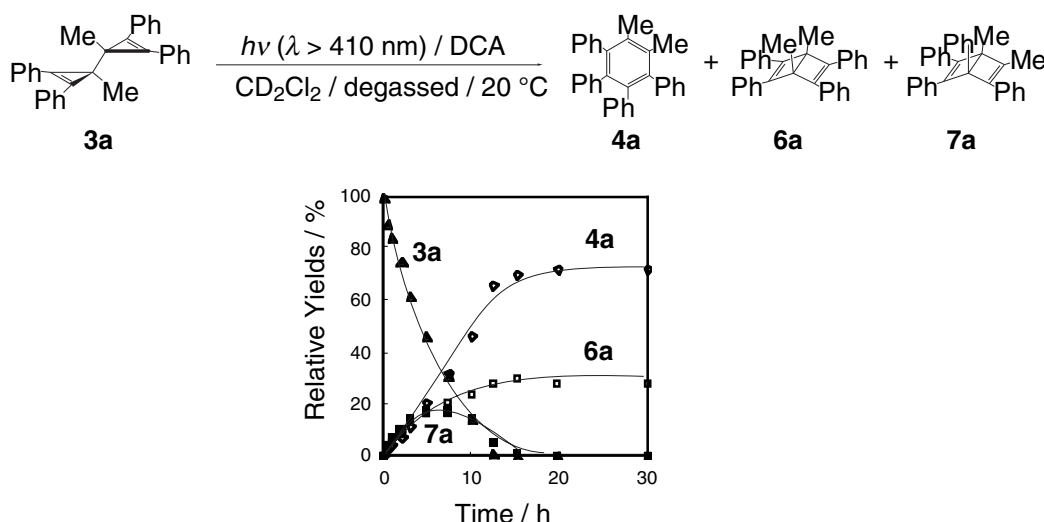

**Figure S1.** Time-dependent changes in the product ratios in the DCA-sensitized PET reaction of **3a**. A 0.6 mL solution was irradiated with a 2 kW Xe lamp through a cutoff filter.  $[\mathbf{3a}] = 0.1 \text{ M}$ . M. B. = 95%

**(3) Isolation of **6** and **7**:** A photolysate obtained by similar PET reaction of **3** (0.2 mmol) and DCA (0.04 mmol) in  $\text{CH}_2\text{Cl}_2$  (20 mL) for 80 min was separated by HPLC ( $\text{Al}_2\text{O}_3$ , *n*-hexane) after removal of solvent at room temperature in the dark. Structures of **6** and **7** were confirmed by chemical reactions (thermolyses) and spectroscopy, especially by  $^1\text{H}$  and  $^{13}\text{C}$

NMR analyses. The physical data shown below were identical with those of **6** and **7** obtained independently by Ag<sup>+</sup>-catalysed reactions.

**6a**: Colorless columns (CH<sub>2</sub>Cl<sub>2</sub>-*n*-hexane); mp 162–163 °C; MS (EI, 70 eV) *m/z* (relative intensity) 410 (100, M<sup>+</sup>), 395 (8, M<sup>+</sup> – Me), 317 (12); IR (KBr)  $\nu$  2949, 1597, 1494, 1441, 775, 761, 743, 725, 692 cm<sup>-1</sup>; <sup>1</sup>H NMR (200 MHz, CDCl<sub>3</sub>)  $\delta$  1.70 (s, 6 H), 7.21–7.31 (m, 12 H), 7.38–7.43 (m, 8 H); <sup>13</sup>C NMR (50 MHz, CDCl<sub>3</sub>)  $\delta$  12.9 (2 C), 55.9 (2 C), 127.1 (8 C), 127.5 (4 C), 128.4 (8 C), 135.9 (4 C), 147.5 (4 C); Anal. Calcd for C<sub>32</sub>H<sub>26</sub>: C, 93.62; H, 6.38. Found: C, 93.44; H, 6.30.

**7a** (thermally labile, purity 90%): Colorless oil; MS (EI, 70 eV) *m/z* (relative intensity) 410 (100, M<sup>+</sup>) 395 (3, M<sup>+</sup> – Me), 317 (5); <sup>1</sup>H NMR (600 MHz, CDCl<sub>3</sub>)  $\delta$  1.03 (s, 3 H), 2.27 (s, 3 H), 7.18–7.32 (m, 12 H), 7.36 (m, 2 H), 7.40 (m, 2 H), 7.56 (m, 4 H); <sup>13</sup>C NMR (150 MHz, CDCl<sub>3</sub>)  $\delta$  11.2, 14.3, 59.1, 63.2, 126.0, 126.5, 127.0 (2 C), 127.1 (2 C), 127.48, 127.52 (2 C), 127.7, 128.1 (2 C), 128.2 (2 C), 128.3 (2 C), 128.5 (2 C), 128.6 (2 C), 135.2, 135.3, 135.8, 139.1, 142.5, 143.6, 148.5, 150.0.

**6b**<sup>3b</sup>: Colorless cubes (CH<sub>2</sub>Cl<sub>2</sub>-*n*-hexane); mp 145–146 °C; MS (EI, 70 eV) *m/z* (relative intensity) 396 (100, M<sup>+</sup>) 381 (6, M<sup>+</sup> – Me), 303 (7); IR (KBr)  $\nu$  2951, 1195, 1441, 1325, 772, 748, 725, 692 cm<sup>-1</sup>; <sup>1</sup>H NMR (200 MHz, CDCl<sub>3</sub>)  $\delta$  1.78 (s, 3 H), 4.08 (s, 1 H), 7.20–7.33 (m, 12 H), 7.41–7.53 (m, 8 H) [lit.<sup>3b</sup>  $\tau$  8.22 (s, 3H), 5.93 (s, 1 H)]; <sup>13</sup>C NMR (50 MHz, CDCl<sub>3</sub>)  $\delta$  15.8, 50.6, 52.9, 126.6 (4 C), 127.1 (4 C), 127.5 (2 C), 127.6 (2 C), 128.4 (4 C), 128.5 (4 C), 136.0 (2 C), 136.1 (2 C), 143.9 (2 C), 148.7 (2 C); Anal. Calcd for C<sub>31</sub>H<sub>24</sub>: C, 93.90; H, 6.10. Found: C, 93.60; H, 6.29.

**7b** (thermally labile, purity 94%): Colorless oil; MS (EI, 70 eV) *m/z* (relative intensity) 396 (100, M<sup>+</sup>), 381 (5, M<sup>+</sup> – Me), 303 (5); <sup>1</sup>H NMR (600 MHz, CDCl<sub>3</sub>)  $\delta$  2.29 (s, 3 H), 3.72 (s, 1 H), 7.15–7.28 (m, 10 H), 7.33–7.39 (m, 6 H), 7.53–7.62 (m, 4 H); <sup>13</sup>C NMR (150 MHz, CDCl<sub>3</sub>)  $\delta$  16.6, 57.0, 58.6, 126.0, 126.2 (2 C), 126.7, 126.9 (2 C), 127.3 (2 C), 127.5 (2 C), 127.6, 128.0, 128.3 (2 C), 128.35 (2 C), 128.38 (2 C), 128.5 (2 C), 135.4, 135.6, 136.2, 140.9, 144.3, 145.25, 145.31, 146.0.

**(4) Determination of  $\Phi_c$** : (1) Determination of usual quantum efficiency ( $\Phi$ ): A CH<sub>2</sub>Cl<sub>2</sub> solution (3 mL) containing **3** (0.03 mmol, 10 mM) and DCA (0.47 mM) was irradiated with light of wavelength at  $\lambda_{\max} = 437 \pm 12$  nm under N<sub>2</sub> at 20  $\pm$  1 °C. Light of this wavelength was obtained from a 500 W Hg-Xe lamp through aqueous CuSO<sub>4</sub> solution filter, a Toshiba cutoff filter UV-37, and an interference filter ( $\lambda_{\max} = 437$  nm). Aberchrome 540P was used as an actinometer. The conversion was 10  $\pm$  5% in all cases. After irradiation and removal of solvent at room temperature in the dark, the photolysate was analyzed by <sup>1</sup>H NMR. The values of  $\Phi$  were obtained as the mean values of three separate runs. (2) Conversion of  $\Phi$  to  $\Phi_{\text{cor}}$ : The  $\Phi$  values were converted to  $\Phi_{\text{cor}}$  using the Stern–Volmer constants in CH<sub>2</sub>Cl<sub>2</sub> ( $k_q\tau = 217$  and 214 M<sup>-1</sup> for **3a** and **3b**, respectively) and the following equations:  $\Phi_{\text{cor}} = \Phi \times (1 + k_q\tau[\mathbf{3}]) / k_q\tau[\mathbf{3}]$ , where  $[\mathbf{3}] = 10$  mM.

(5) The Cartesian coordinates and the  $\Sigma\rho$  and  $\Sigma q$  values for  $3a^{*+}$  and  $3b^{*+}$  (ROB3LYP/6-31G(p)).

Table S1. The Cartesian Coordinates, the Sum of the Partial Spin and Charge Densities ( $\Sigma\rho$  and  $\Sigma q$ ) of  $3a^{*+}$  Obtained by ROB3LYP/6-31G(p) Calculations (PC GAMESS ver. 6.3)

| No | Atom | Cartesian Coordinates |              |              | $\Sigma\rho$ | $\Sigma q$ |
|----|------|-----------------------|--------------|--------------|--------------|------------|
|    |      | x                     | y            | z            |              |            |
| 1  | C    | -0.578180059          | -0.601643192 | 0.000000000  | +0.068315    | -0.125195  |
| 2  | C    | 0.578180059           | 0.601643192  | 0.000000000  | +0.068315    | -0.125195  |
| 3  | C    | 0.044441275           | -1.994028396 | 0.000000000  | +0.029135    | -0.223340  |
| 4  | C    | -0.044441275          | 1.994028396  | 0.000000000  | +0.029135    | -0.223340  |
| 5  | C    | -1.851076405          | -0.286314400 | 0.668823831  | +0.135174    | -0.010606  |
| 6  | C    | 1.851076405           | 0.286314400  | -0.668823831 | +0.135174    | -0.010606  |
| 7  | C    | -1.851076405          | -0.286314400 | -0.668823831 | +0.135174    | -0.010606  |
| 8  | C    | 1.851076405           | 0.286314400  | 0.668823831  | +0.135174    | -0.010606  |
| 9  | C    | -2.529757465          | -0.205526834 | 1.926000500  | +0.009422    | -0.036729  |
| 10 | C    | 2.529757465           | 0.205526834  | -1.926000500 | +0.009422    | -0.036729  |
| 11 | C    | -2.529757465          | -0.205526834 | -1.926000500 | +0.009422    | -0.036729  |
| 12 | C    | 2.529757465           | 0.205526834  | 1.926000500  | +0.009422    | -0.036729  |
| 13 | C    | -1.877916894          | -0.637881917 | 3.089019655  | +0.017847    | -0.089822  |
| 14 | C    | 1.877916894           | 0.637881917  | -3.089019655 | +0.017847    | -0.089822  |
| 15 | C    | -1.877916894          | -0.637881917 | -3.089019655 | +0.017847    | -0.089822  |
| 16 | C    | 1.877916894           | 0.637881917  | 3.089019655  | +0.017847    | -0.089822  |
| 17 | C    | -3.838586836          | 0.286260837  | 2.022389493  | +0.016955    | -0.043581  |
| 18 | C    | 3.838586836           | -0.286260837 | -2.022389493 | +0.016955    | -0.043581  |
| 19 | C    | -3.838586836          | 0.286260837  | -2.022389493 | +0.016955    | -0.043581  |
| 20 | C    | 3.838586836           | -0.286260837 | 2.022389493  | +0.016955    | -0.043581  |
| 21 | C    | -2.519770591          | -0.583964845 | 4.313838055  | +0.001074    | -0.142107  |
| 22 | C    | 2.519770591           | 0.583964845  | -4.313838055 | +0.001074    | -0.142107  |
| 23 | C    | -2.519770591          | -0.583964845 | -4.313838055 | +0.001074    | -0.142107  |
| 24 | C    | 2.519770591           | 0.583964845  | 4.313838055  | +0.001074    | -0.142107  |
| 25 | C    | -4.475730728          | 0.342695143  | 3.248605042  | +0.000622    | -0.148279  |
| 26 | C    | 4.475730728           | -0.342695143 | -3.248605042 | +0.000622    | -0.148279  |
| 27 | C    | -4.475730728          | 0.342695143  | -3.248605042 | +0.000622    | -0.148279  |
| 28 | C    | 4.475730728           | -0.342695143 | 3.248605042  | +0.000622    | -0.148279  |
| 29 | C    | -3.818347171          | -0.092973667 | 4.395183862  | +0.018616    | -0.093168  |
| 30 | C    | 3.818347171           | 0.092973667  | -4.395183862 | +0.018616    | -0.093168  |
| 31 | C    | -3.818347171          | -0.092973667 | -4.395183862 | +0.018616    | -0.093168  |
| 32 | C    | 3.818347171           | 0.092973667  | 4.395183862  | +0.018616    | -0.093168  |
| 33 | H    | -0.880182835          | -1.020312598 | 3.024472390  | +0.000105    | +0.159776  |
| 34 | H    | 0.880182835           | 1.020312598  | -3.024472390 | +0.000105    | +0.159776  |
| 35 | H    | -0.880182835          | -1.020312598 | -3.024472390 | +0.000105    | +0.159776  |
| 36 | H    | 0.880182835           | 1.020312598  | 3.024472390  | +0.000105    | +0.159776  |
| 37 | H    | -4.347186402          | 0.624590313  | 1.144789643  | +0.000050    | +0.148634  |
| 38 | H    | 4.347186402           | -0.624590313 | -1.144789643 | +0.000050    | +0.148634  |
| 39 | H    | -4.347186402          | 0.624590313  | -1.144789643 | +0.000050    | +0.148634  |
| 40 | H    | 4.347186402           | -0.624590313 | 1.144789643  | +0.000050    | +0.148634  |
| 41 | H    | -2.018537999          | -0.923426701 | 5.196207373  | +0.000006    | +0.162835  |

|    |   |              |              |              |           |           |
|----|---|--------------|--------------|--------------|-----------|-----------|
| 42 | H | 2.018537999  | 0.923426701  | -5.196207373 | +0.000006 | +0.162835 |
| 43 | H | -2.018537999 | -0.923426701 | -5.196207373 | +0.000006 | +0.162835 |
| 44 | H | 2.018537999  | 0.923426701  | 5.196207373  | +0.000006 | +0.162835 |
| 45 | H | -5.474305422 | 0.721226624  | 3.314886802  | +0.000004 | +0.167182 |
| 46 | H | 5.474305422  | -0.721226624 | -3.314886802 | +0.000004 | +0.167182 |
| 47 | H | -5.474305422 | 0.721226624  | -3.314886802 | +0.000004 | +0.167182 |
| 48 | H | 5.474305422  | -0.721226624 | 3.314886802  | +0.000004 | +0.167182 |
| 49 | H | -4.314554957 | -0.050373326 | 5.342732918  | +0.000056 | +0.170215 |
| 50 | H | 4.314554957  | 0.050373326  | -5.342732918 | +0.000056 | +0.170215 |
| 51 | H | -4.314554957 | -0.050373326 | -5.342732918 | +0.000056 | +0.170215 |
| 52 | H | 4.314554957  | 0.050373326  | 5.342732918  | +0.000056 | +0.170215 |
| 53 | H | -0.733265691 | -2.744282904 | 0.000000000  | +0.001428 | +0.122223 |
| 54 | H | 0.733265691  | 2.744282904  | 0.000000000  | +0.001428 | +0.122223 |
| 55 | H | 0.661249424  | -2.141554505 | -0.875790767 | +0.000630 | +0.118807 |
| 56 | H | -0.661249424 | 2.141554505  | 0.875790767  | +0.000630 | +0.118807 |
| 57 | H | 0.661249424  | -2.141554505 | 0.875790767  | +0.000630 | +0.118807 |
| 58 | H | -0.661249424 | 2.141554505  | -0.875790767 | +0.000630 | +0.118807 |

Heat of Formation: -1226.2109053997 a.u.

Table S2. The Cartesian Coordinates, the Sum of the Partial Spin and Charge Densities ( $\Sigma\rho$  and  $\Sigma q$ ) of **3b**<sup>•+</sup> Obtained by ROB3LYP/6-31G(p) Calculations (PC GAMESS ver. 6.3)

| No | Atom | Cartesian Coordinates |              |              | $\Sigma\rho$ | $\Sigma q$ |
|----|------|-----------------------|--------------|--------------|--------------|------------|
|    |      | x                     | y            | z            |              |            |
| 1  | C    | -0.559549225          | -0.639476666 | 0.000000000  | +0.033709    | -0.129180  |
| 2  | C    | 0.539463289           | 0.446694960  | 0.000000000  | +0.008038    | -0.127390  |
| 3  | C    | -0.037659591          | -2.070746738 | 0.000000000  | +0.005954    | -0.231190  |
| 4  | H    | 0.122636513           | 1.441623378  | 0.000000000  | +0.034269    | +0.187870  |
| 5  | C    | -1.872751714          | -0.274072149 | -0.650569266 | +0.009224    | -0.050900  |
| 6  | C    | -1.872751714          | -0.274072149 | 0.650569266  | +0.009224    | -0.050900  |
| 7  | C    | 1.854499770           | 0.271795248  | -0.684860900 | +0.278684    | +0.005144  |
| 8  | C    | 1.854499770           | 0.271795248  | 0.684860900  | +0.278684    | +0.005144  |
| 9  | C    | -2.533864619          | -0.145178871 | -1.930244985 | +0.000220    | -0.010730  |
| 10 | C    | -2.533864619          | -0.145178871 | 1.930244985  | +0.000220    | -0.010730  |
| 11 | C    | -1.960843095          | -0.712484975 | -3.071453528 | +0.001083    | -0.122360  |
| 12 | C    | -1.960843095          | -0.712484975 | 3.071453528  | +0.001083    | -0.122360  |
| 13 | C    | -3.752086937          | 0.528302358  | -2.051367655 | +0.001096    | -0.066330  |
| 14 | C    | -3.752086937          | 0.528302358  | 2.051367655  | +0.001096    | -0.066330  |
| 15 | C    | -2.591354160          | -0.611884936 | -4.302496420 | +0.000087    | -0.134420  |
| 16 | C    | -2.591354160          | -0.611884936 | 4.302496420  | +0.000087    | -0.134420  |
| 17 | C    | -4.379054458          | 0.630972572  | -3.282854930 | +0.000005    | -0.139530  |
| 18 | C    | -4.379054458          | 0.630972572  | 3.282854930  | +0.000005    | -0.139530  |
| 19 | C    | -3.800907947          | 0.062154979  | -4.411549968 | +0.001098    | -0.112480  |
| 20 | C    | -3.800907947          | 0.062154979  | 4.411549968  | +0.001098    | -0.112480  |
| 21 | H    | -1.038028888          | -1.250150360 | -2.987926818 | +0.000053    | +0.138567  |
| 22 | H    | -1.038028888          | -1.250150360 | 2.987926818  | +0.000053    | +0.138567  |
| 23 | H    | -4.202845862          | 0.972367629  | -1.188791387 | +0.000003    | +0.142513  |

|    |   |              |              |              |           |           |
|----|---|--------------|--------------|--------------|-----------|-----------|
| 24 | H | -4.202845862 | 0.972367629  | 1.188791387  | +0.000003 | +0.142513 |
| 25 | H | -2.149116942 | -1.062601892 | -5.167337796 | +0.000001 | +0.148075 |
| 26 | H | -2.149116942 | -1.062601892 | 5.167337796  | +0.000001 | +0.148075 |
| 27 | H | -5.312301996 | 1.149320965  | -3.362547443 | +0.000001 | +0.156814 |
| 28 | H | -5.312301996 | 1.149320965  | 3.362547443  | +0.000001 | +0.156814 |
| 29 | H | -4.288867868 | 0.140306404  | -5.361160506 | +0.000004 | +0.157322 |
| 30 | H | -4.288867868 | 0.140306404  | 5.361160506  | +0.000004 | +0.157322 |
| 31 | C | 2.531374614  | 0.244704126  | -1.918894368 | +0.037995 | -0.073080 |
| 32 | C | 2.531374614  | 0.244704126  | 1.918894368  | +0.037995 | -0.073080 |
| 33 | C | 1.802239766  | 0.494530178  | -3.098927745 | +0.041003 | -0.051150 |
| 34 | C | 1.802239766  | 0.494530178  | 3.098927745  | +0.041003 | -0.051150 |
| 35 | C | 3.916275719  | -0.004081815 | -2.006339423 | +0.038882 | -0.008750 |
| 36 | C | 3.916275719  | -0.004081815 | 2.006339423  | +0.038882 | -0.008750 |
| 37 | C | 2.439680534  | 0.500370755  | -4.323148636 | +0.002691 | -0.153360 |
| 38 | C | 2.439680534  | 0.500370755  | 4.323148636  | +0.002691 | -0.153360 |
| 39 | C | 4.545814940  | -0.002410422 | -3.232138393 | +0.002716 | -0.160600 |
| 40 | C | 4.545814940  | -0.002410422 | 3.232138393  | +0.002716 | -0.160600 |
| 41 | C | 3.808458139  | 0.251319501  | -4.389449886 | +0.043901 | -0.066660 |
| 42 | C | 3.808458139  | 0.251319501  | 4.389449886  | +0.043901 | -0.066660 |
| 43 | H | 0.751080078  | 0.684806670  | -3.035886378 | +0.000107 | +0.190026 |
| 44 | H | 0.751080078  | 0.684806670  | 3.035886378  | +0.000107 | +0.190026 |
| 45 | H | 4.479483728  | -0.199941409 | -1.119275878 | +0.000125 | +0.157416 |
| 46 | H | 4.479483728  | -0.199941409 | 1.119275878  | +0.000125 | +0.157416 |
| 47 | H | 1.886183341  | 0.697425636  | -5.216666151 | +0.000015 | +0.180429 |
| 48 | H | 1.886183341  | 0.697425636  | 5.216666151  | +0.000015 | +0.180429 |
| 49 | H | 5.595861982  | -0.193713724 | -3.298296489 | +0.000016 | +0.179532 |
| 50 | H | 5.595861982  | -0.193713724 | 3.298296489  | +0.000016 | +0.179532 |
| 51 | H | 4.301854119  | 0.254190861  | -5.339544296 | +0.000126 | +0.185435 |
| 52 | H | 4.301854119  | 0.254190861  | 5.339544296  | +0.000126 | +0.185435 |
| 53 | H | -0.865475117 | -2.764577603 | 0.000000000  | +0.000071 | +0.129056 |
| 54 | H | 0.568471651  | -2.278083967 | -0.875287955 | -0.00016  | +0.094489 |
| 55 | H | 0.568471651  | -2.278083967 | 0.875287955  | -0.00016  | +0.094489 |

Heat of Formation: -1187.1892213029 a.u.

## Note and Reference

(31) The sample solution was slightly suspended with DCA. The actual concentrations of DCA are the saturated ones, which are *ca.*  $2 \times 10^{-3}$  M at 20 °C.<sup>32</sup>

(32) Ikeda, H.; Aburakawa, N.; Tanaka, F.; Fukushima, T.; Miyashi, T. *Eur. J. Org. Chem.* **2001**, 3445–3452.

(End)
